# Supplementary material for: Recent genetic, phenetic and ecological divergence across the Mesoamerican highlands: a study case withDiglossa baritula(Aves: Thraupidae)
Source: PeerJ journal article supplement (doi:10.7717/peerj.16797), 2024-03-22
Supplement: SuppFigTable.pdf [file SuppFigTable.pdf]

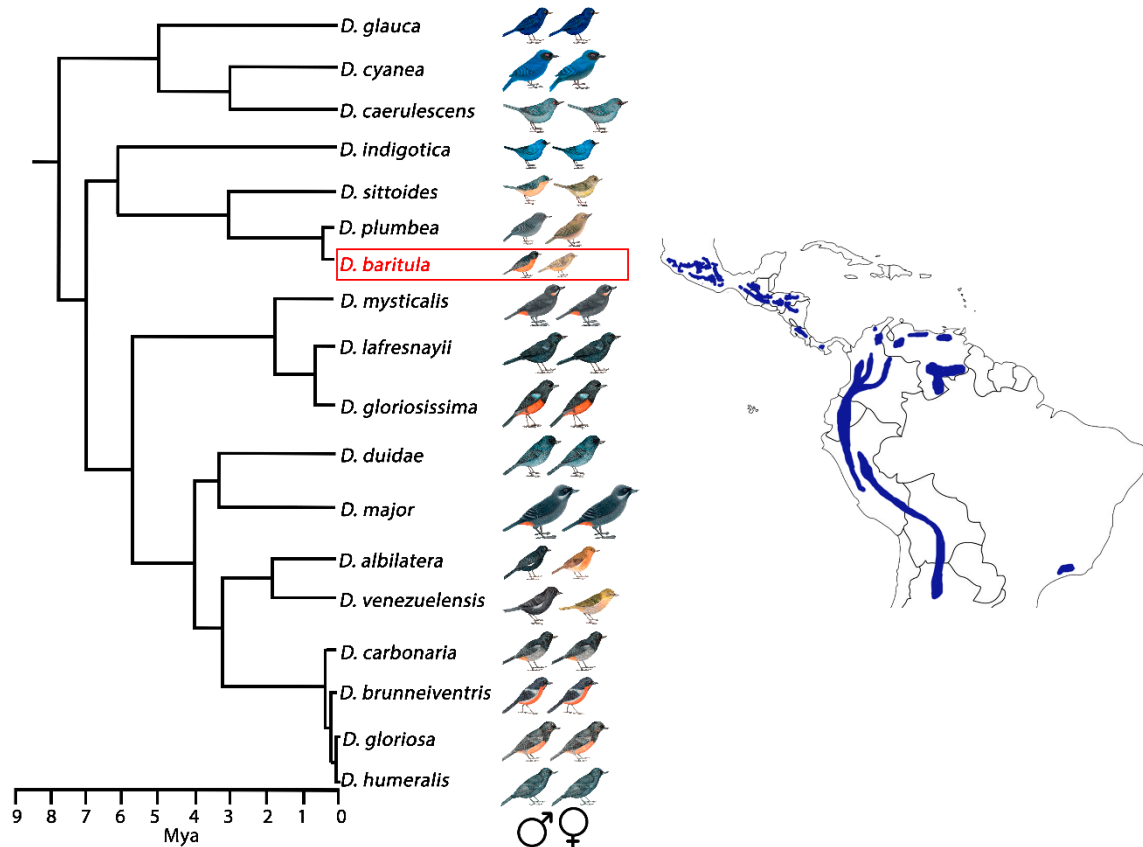

**Figure S1.** Evolutionary radiation of the *Diglossa* genus, showing that in less than 10 million years there has been a great diversification in patterns of coloration, body size, etc. Dated phylogeny modified from Barker et al., 2015, in red the species of this study. The illustrations of the females and males were made by Arantza Lujambio-Ramírez, J. Alberto Hernández-Martínez and Margarita I. Reyes-Vargas.

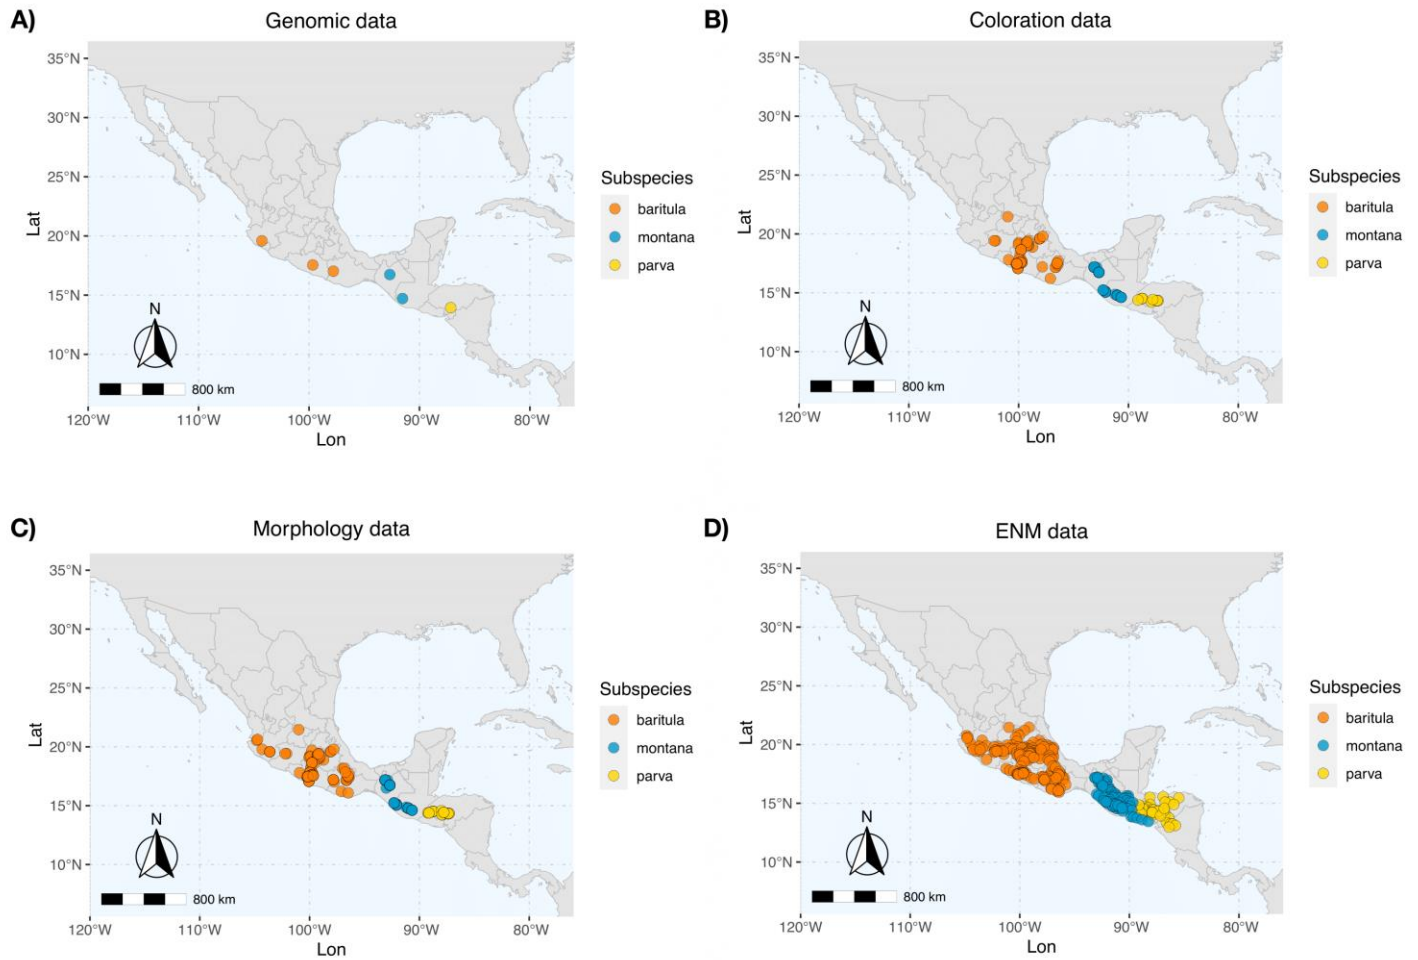

**Figure S2.** Distribution of samples used in this study. A) Samples used for genomic analysis,  $n=6$ . B) Data used in coloration analysis,  $n=85$ . C) Data used in morphological analysis,  $n=75$ . D) Occurrence data used in Ecological Niche Modeling analysis,  $n=288$ . Subspecies distribution is shown in different colors: *D. b. baritula* in orange, *D. b. montana* in blue and *D. b. parva* in yellow.

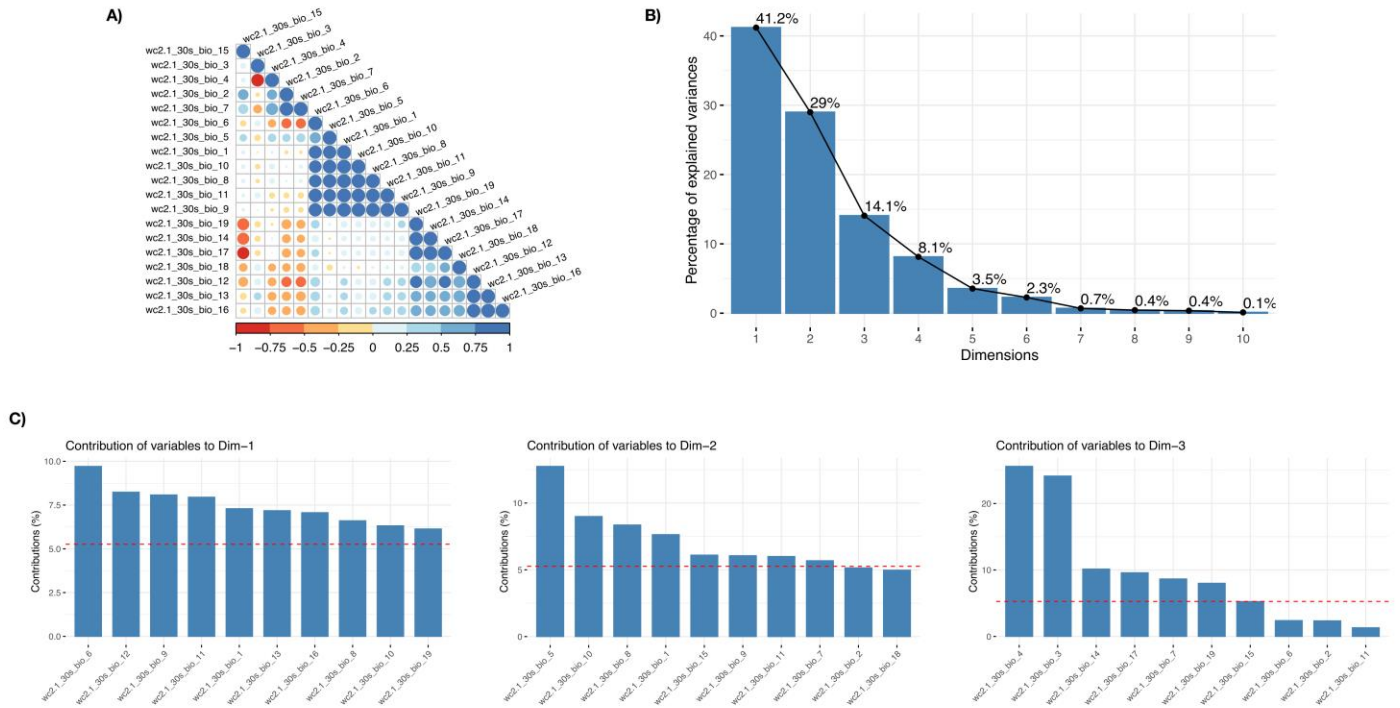

**Figure S3.** Correlation and Principal Component Analysis taken into account for the selection of bioclimatic variables in Ecological Niche modeling analysis. A) Pearson correlation ( $r > 0.075$ ); B) Percentage of explained variance for the first 10 principal components; C) Contribution of variables in the first three principal components. These analyses were performed using the 288 occurrence points for the *D. baritula* complex.

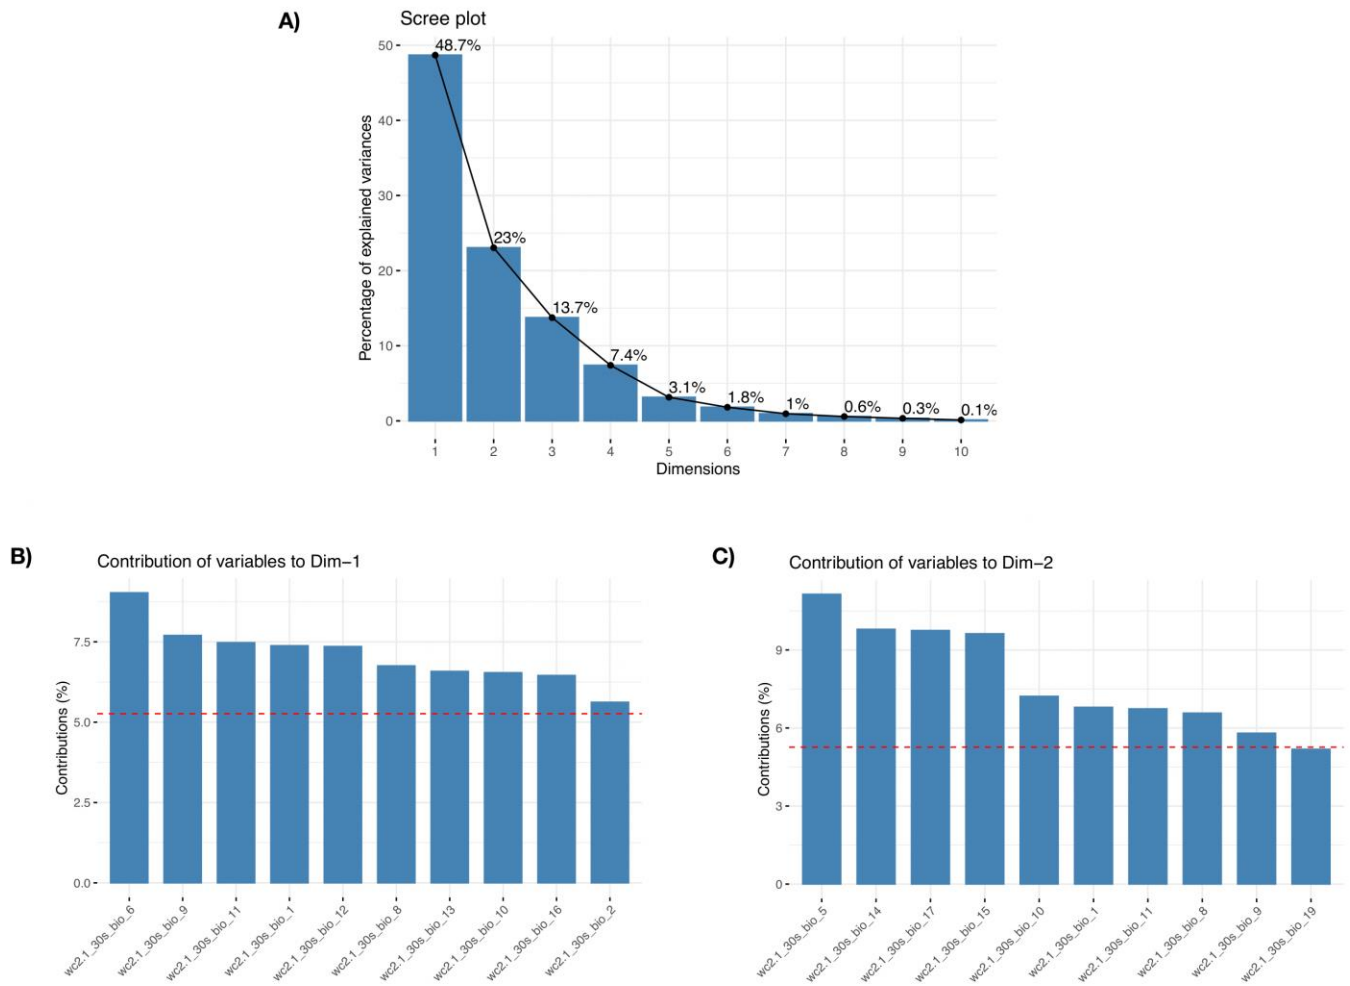

**Figure S4.** Principal Component Analysis performed in Niche Overlap analysis. A) Percentage of explained variance for the first 10 principal component analysis; B) Contribution of variables for the first principal components; C) Contribution of variables for the first principal components. These analyses were performed using the 288 occurrence points for the *D. baritula* complex, and the background points for the accessible area for the species.

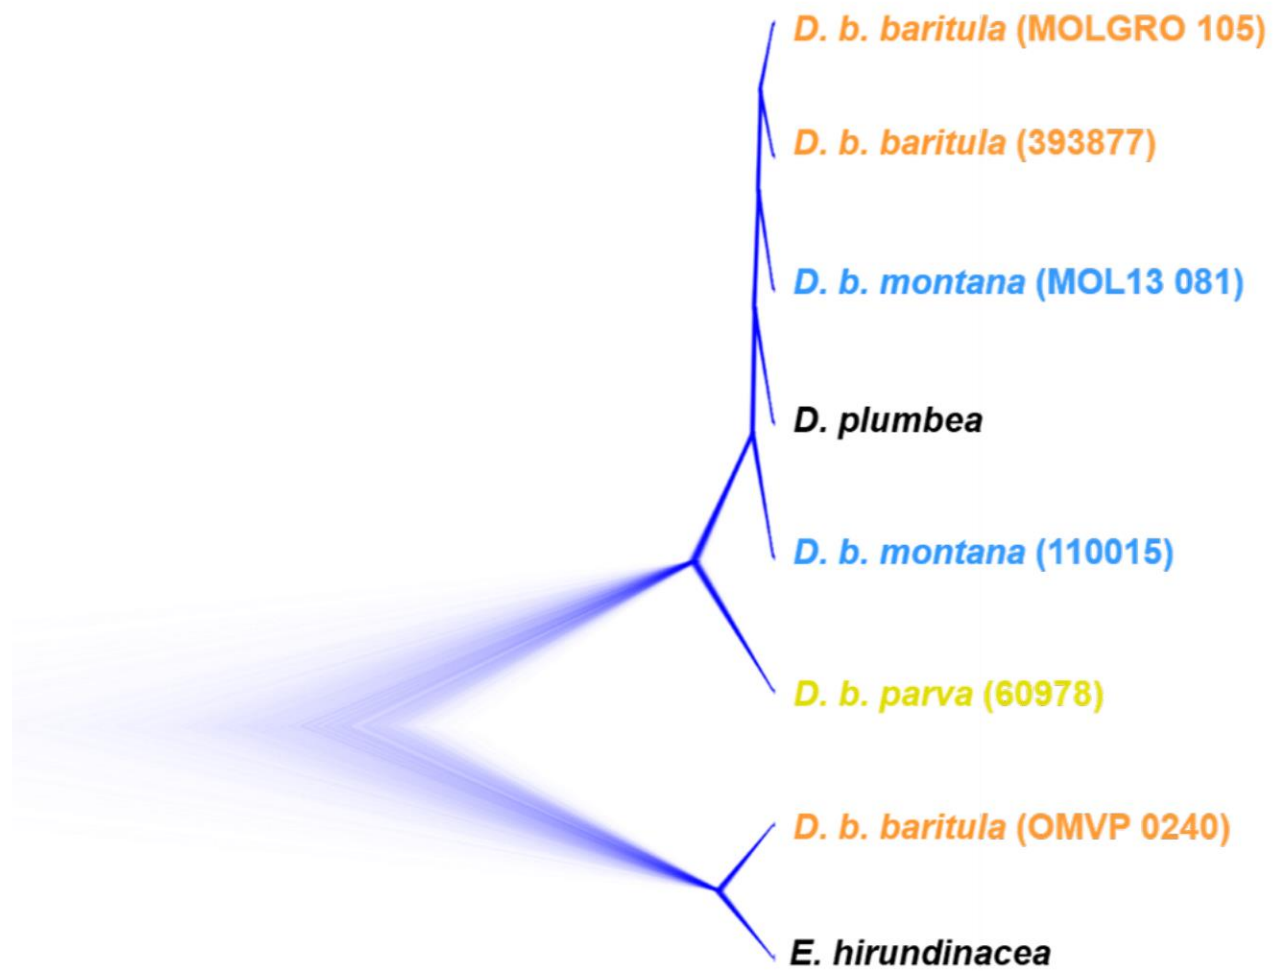

**Figure S5.** SNAPP species tree obtained from 33,702 loci RADseq loci. In orange *D. b. baritula*, in blue *D. b. montana* and in yellow *D. b. parva*.

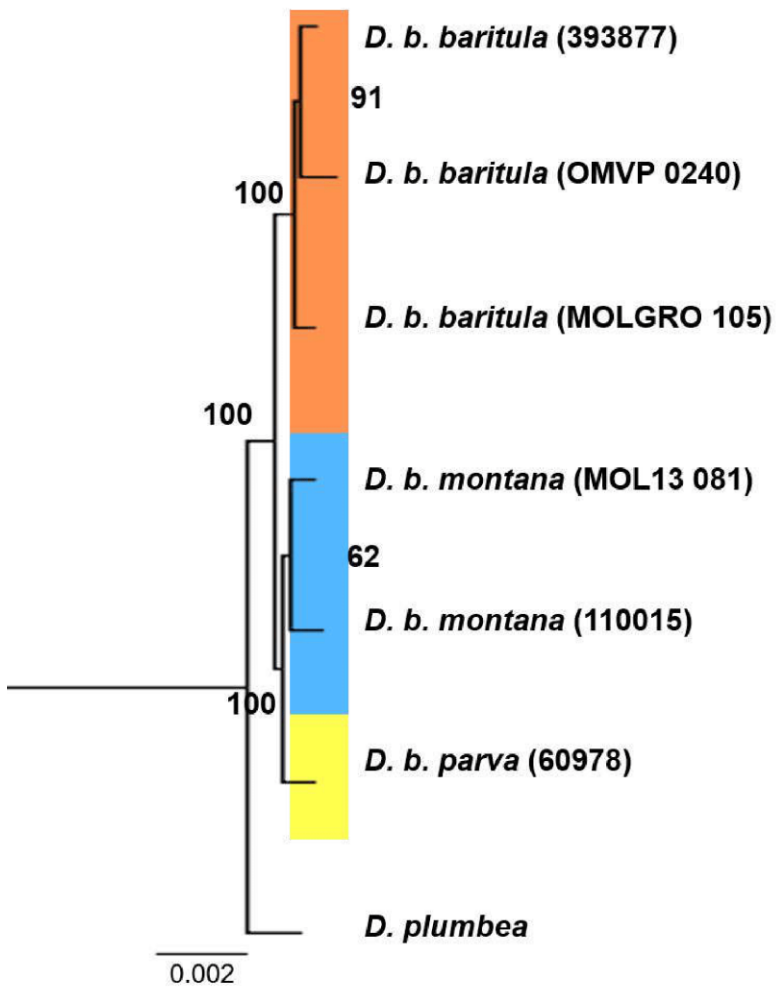

**Figure S6.** Maximum likelihood phylogenomic tree obtained from 43,704 RADseq loci representing phylogenetic relationships among clades in the *Diglossa baritula* complex, in orange *D. b. baritula*, in blue *D. b. montana* and in yellow *D. b. parva*. Numbers indicate bootstrap node supports. *Diglossa plumbea* and *Euphonia hirundinacea* are used as sister group and outgroup, respectively.

---

**Table S1 Taxonomic proposals for *Diglossa* species.**

| <b>Reference</b>                          | <b>Taxonomic hypothesis</b>                                                                                                                                                                                                                                                 | <b>Data used</b>                       |
|-------------------------------------------|-----------------------------------------------------------------------------------------------------------------------------------------------------------------------------------------------------------------------------------------------------------------------------|----------------------------------------|
| Cassin (1864) & Sclater (1875)            | The species were included in two genera, <i>Diglossa</i> and <i>Diglossopsis</i> , the latter being a monotypic genus containing only <i>Diglossopsis caerulescens</i> , which has the smallest bill.                                                                       | Bill size and coloration               |
| Hellmayr (1935)                           | Some closely related species were combined, reducing the number of species.                                                                                                                                                                                                 | Morphology                             |
| Vuilleumier (1969)                        | Two ranges of taxonomic classification were proposed: four “species groups” ( <i>major</i> , <i>lafresnayii</i> , <i>albilatera</i> and <i>caerulescens</i> ) and four “superspecies” ( <i>lafresnayii</i> , <i>carbonaria</i> , <i>baritula</i> , and <i>albilatera</i> ). | Bill and tongue morphology, coloration |
| Bock (1985)                               | The genus <i>Diglossopsis</i> was returned, where <i>D. caerulescens</i> , <i>D. cyanea</i> and <i>D. glauca</i> were included.                                                                                                                                             | Skull, tongue and bill morphology      |
| Sibley & Monroe (1990)                    | <i>D. indigotica</i> was moved to <i>Diglossopsis</i> .                                                                                                                                                                                                                     | DNA-DNA hybridization                  |
| Dickinson (2003) and Rensen et al. (2008) | <i>Diglossopsis</i> was absorbed by <i>Diglossa</i> .                                                                                                                                                                                                                       | Not specified                          |

---

---

**Table S2 Taxonomic positions for the *D. baritula* complex.**

| <b>Reference</b>                       | <b>Taxonomic classification</b>                                                                                                                                      |
|----------------------------------------|----------------------------------------------------------------------------------------------------------------------------------------------------------------------|
| Wagler (1832)                          | <i>D. baritula</i> species was named, which is the type species of the genus.                                                                                        |
| Dearbon (1907)                         | <i>D. b. montana</i> subspecies was described.                                                                                                                       |
| Griscom (1932)                         | The third subspecies, <i>D. b. parva</i> , was named                                                                                                                 |
| Hellmayr (1935)                        | <i>D. baritula</i> , <i>D. plumbea</i> and <i>D. sittoides</i> grouped as a single species.                                                                          |
| Friedmann et al. (1950)                | Two subspecies were reported: <i>D. b. baritula</i> (pico chueco mexicano) and <i>D. b. montana</i> (pico chueco chiapaneco).                                        |
| Skutch (1954)                          | <i>D. baritula</i> and <i>D. plumbea</i> combined as a single species with three subspecies: <i>D. b. baritula</i> , <i>D. b. montana</i> and <i>D. b. plumbea</i> . |
| Vuilleumier (1969)                     | <i>D. baritula</i> was grouped with <i>D. montana</i> and <i>D. sittoides</i> in the <i>baritula</i> superspecies.                                                   |
| Monroe (1968) and Isler & Isler (1987) | Three subspecies were mentioned: <i>D. b. baritula</i> , <i>D. b. montana</i> and <i>D. b. parva</i> .                                                               |

---



**Table S3 Information for the *Diglossa baritula* specimens included in this study.**

| Subspecies            | Coll | ID sample     | G  | Lat        | Long         | Locality                                              | Gen | Morp | Col |
|-----------------------|------|---------------|----|------------|--------------|-------------------------------------------------------|-----|------|-----|
| <i>D. b. baritula</i> | CNAV | 11045         | F  | 19.8       | -104.32333   | Mexico, Jalisco, Reserva de la Biosfera de Miahuatlan |     | X    |     |
| <i>D. b. baritula</i> | CNAV | 11047         | F  | 18.15      | -99.9        | Mexico, Guerrero, Tepoxtepec                          |     | X    |     |
| <i>D. b. baritula</i> | CNAV | 11048         | F  | 17.41666   | -100.11666   | Mexico, Guerrero, Atoyac de Álvarez                   |     | X    |     |
| <i>D. b. baritula</i> | CNAV | 11050         | F  | 17.01666   | -97.75       | Mexico, Oaxaca, Santiago Nuyoo                        |     | X    |     |
| <i>D. b. baritula</i> | CNAV | 11054         | M  | 19.26166   | -99.99166    | Mexico, Mexico state, Amanalco                        |     | X    | X   |
| <i>D. b. baritula</i> | CNAV | 11055         | F  | 19.706934  | -99.786552   | Mexico, Mexico state, Jocotitlán                      |     | X    |     |
| <i>D. b. baritula</i> | CNAV | 11057         | F  | 19.11666   | -100.01666   | Mexico, Mexico state, Temascaltepec                   |     | X    |     |
| <i>D. b. baritula</i> | CNAV | 11058         | M  | 19.11666   | -100.01666   | Mexico, Mexico state, Temascaltepec                   |     | X    | X   |
| <i>D. b. baritula</i> | CNAV | 11059         | F  | 19.29527   | -99.24       | Mexico, Mexico city, La Magdalena Contreras           |     | X    |     |
| <i>D. b. baritula</i> | CNAV | 11060         | M  | 19.29527   | -99.24       | Mexico, Mexico city, La Magdalena Contreras           |     | X    | X   |
| <i>D. b. baritula</i> | CNAV | 11061         | M  | 19.29527   | -99.24       | Mexico, Mexico city, La Magdalena Contreras           |     | X    | X   |
| <i>D. b. baritula</i> | CNAV | 11062         | M  | 19.6       | -98.08333    | Mexico, Tlaxcala, Tlaxco                              |     | X    | X   |
| <i>D. b. baritula</i> | CNAV | 11063         | M  | 19.6       | -98.08333    | Mexico, Tlaxcala, Tlaxco                              |     | X    | X   |
| <i>D. b. baritula</i> | CNAV | 11064         | M  | 19.6       | -98.08333    | Mexico, Tlaxcala, Tlaxco                              |     | X    | X   |
| <i>D. b. baritula</i> | CNAV | 11065         | M  | 18.89166   | -98.72833    | Mexico, Morelos, Tetela                               |     | X    | X   |
| <i>D. b. baritula</i> | CNAV | 11066         | M  | 19.01666   | -99.09333    | Mexico, Morelos, Tetela                               |     | X    | X   |
| <i>D. b. baritula</i> | CNAV | 14180         | F  | 19.16833   | -99.90333    | Mexico, Morelos, Tetela                               |     | X    |     |
| <i>D. b. baritula</i> | CNAV | 14687         | M  | 16.21666   | -97.11666    | Mexico, Oaxaca, La Cima                               |     | X    | X   |
| <i>D. b. baritula</i> | CNAV | 14688         | M  | 18.15      | -99.9        | Mexico, Guerrero, Tepoxtepec                          |     | X    | X   |
| <i>D. b. baritula</i> | CNAV | 14689         | M  | 17.16666   | -96.61666    | Mexico, Oaxaca, Cerro San Felipe                      |     | X    | X   |
| <i>D. b. baritula</i> | CNAV | 14690         | M  | 17.16333   | -96.675      | Mexico, Oaxaca, Cerro San Felipe                      |     | X    | X   |
| <i>D. b. baritula</i> | CNAV | 14719         | F  | 17.16666   | -96.61666    | Mexico, Oaxaca, Cerro San Felipe                      |     | X    |     |
| <i>D. b. baritula</i> | CNAV | 17555         | M  | 19.03333   | -99.205      | Mexico, Morelos, Coajomulco                           |     | X    | X   |
| <i>D. b. baritula</i> | CNAV | 22951         | M  | 19.2647    | -99.299      | Mexico, Mexico city, Dinamo 4                         |     | X    | X   |
| <i>D. b. baritula</i> | CNAV | 22952         | M  | 19.2647    | -99.299      | Mexico, Mexico city, Dinamo 4                         |     | X    | X   |
| <i>D. b. baritula</i> | CNAV | 24849         | M  | 17.3970306 | -96.428366   | Mexico, Oaxaca, Cerro de los Pozuelos                 |     | X    | X   |
| <i>D. b. baritula</i> | CNAV | 24850         | F  | 17.3970306 | -96.428366   | Mexico, Oaxaca, Cerro de los Pozuelos                 |     | X    |     |
| <i>D. b. baritula</i> | CNAV | 27132         | M  | 19.42241   | -102.088     | Mexico, Michoacán, Parque Nacional del Cupatitzio     |     | X    | X   |
| <i>D. b. baritula</i> | AMNH | 40345         | M  | 19.4326009 | -99.1333416  | Mexico, Mexico city                                   |     | X    | X   |
| <i>D. b. baritula</i> | AMNH | 105891        | M  | 19.579     | -103.623     | Mexico, Jalisco, Volcán de Nieve                      |     | X    |     |
| <i>D. b. baritula</i> | AMNH | 105892        | M  | 19.579     | -103.623     | Mexico, Jalisco, Volcán de Nieve                      |     | X    |     |
| <i>D. b. baritula</i> | AMNH | 105893        | F  | 19.579     | -103.623     | Mexico, Jalisco, Volcán de Nieve                      |     | X    |     |
| <i>D. b. baritula</i> | FMNH | 393877        | ND | 19.591827  | -104.265508  | Mexico, Jalisco, Las Joyas                            | X   |      |     |
| <i>D. b. baritula</i> | AMNH | 508149        | M  | 20.537108  | -104.81302   | Mexico, Jalisco, Mascota                              |     | X    |     |
| <i>D. b. baritula</i> | AMNH | 508150        | M  | 20.628395  | -104.739202  | Mexico, Jalisco, Juanacatlán                          |     | X    |     |
| <i>D. b. baritula</i> | AMNH | 778545        | M  | 19.018976  | -99.26216    | Mexico, Morelos, Cuernavaca                           |     | X    | X   |
| <i>D. b. baritula</i> | MZFC | AGH 032       | M  | 17.065     | -100.0666667 | Mexico, Guerrero, Omiltemi                            |     | X    | X   |
| <i>D. b. baritula</i> | MZFC | AGH SN 5025   | M  | 17.065     | -100.0666667 | Mexico, Guerrero, Omiltemi                            |     | X    | X   |
| <i>D. b. baritula</i> | MZFC | AGNS 0175     | M  | 19.295     | -99.24       | Mexico, Mexico city, Primer Dinamo                    |     | X    | X   |
| <i>D. b. baritula</i> | MZFC | AGNS 0206     | M  | 17.5       | -100.2666667 | Mexico, Guerrero, Toro Muerto                         |     | X    | X   |
| <i>D. b. baritula</i> | MZFC | AGNS 0216     | F  | 17.5       | -100.2666667 | Mexico, Guerrero, Toro Muerto                         |     | X    |     |
| <i>D. b. baritula</i> | MZFC | AGNS 0366     | M  | 17.4833333 | -100.2       | Mexico, Guerrero, El Iris                             |     | X    | X   |
| <i>D. b. baritula</i> | MZFC | AGNS 1023     | F  | 17.515     | -96.505      | Mexico, Oaxaca, La Esperanza                          |     | X    |     |
| <i>D. b. baritula</i> | MZFC | AGNS 1024     | M  | 17.51      | -96.50333333 | Mexico, Oaxaca, La Esperanza                          |     | X    | X   |
| <i>D. b. baritula</i> | MZFC | AGNS SN 02391 | F  | 19.295     | -99.24       | Mexico, Mexico city, Primer Dinamo                    |     | X    |     |
| <i>D. b. baritula</i> | MZFC | AGNS SN 03996 | F  | 17.4833333 | -100.2       | Mexico, Guerrero, El Iris                             |     | X    |     |
| <i>D. b. baritula</i> | MZFC | AGNS SN 04983 | F  | 17.5       | -100.2666667 | Mexico, Guerrero, El Iris                             |     | X    |     |

|                       |      |               |    |            |              |                                           |   |   |   |
|-----------------------|------|---------------|----|------------|--------------|-------------------------------------------|---|---|---|
| <i>D. b. baritula</i> | MZFC | AGNS SN 05026 | M  | 17.065     | -100.0666667 | Mexico, Guerrero, Omiltemi                |   | X | X |
| <i>D. b. baritula</i> | MZFC | AGNS SN 05027 | M  | 17.7416666 | -99.72666667 | Mexico, Guerrero, Omiltemi                |   | X | X |
| <i>D. b. baritula</i> | MZFC | AGNS SN 05030 | F  | 17.7416666 | -99.72666667 | Mexico, Guerrero, Omiltemi                |   | X |   |
| <i>D. b. baritula</i> | MZFC | AGNS SN 05032 | F  | 17.065     | -100.0666667 | Mexico, Guerrero, Omiltemi                |   | X |   |
| <i>D. b. baritula</i> | MZFC | AGNS SN 05034 | F  | 17.065     | -100.0666667 | Mexico, Guerrero, Omiltemi                |   | X |   |
| <i>D. b. baritula</i> | MZFC | AHC 099       | M  | 19.79948   | -97.80345    | Mexico, Puebla, Chopilco Alto             |   | X | X |
| <i>D. b. baritula</i> | MZFC | ATP2002 18    | F  | 19.25715   | -99.03473333 | Mexico, Mexico city, Ajusco medio         | * |   |   |
| <i>D. b. baritula</i> | MZFC | BEHB 009      | M  | 17.705     | -96.4116666  | Mexico, Oaxaca, Puerto Eligio             |   | X | X |
| <i>D. b. baritula</i> | MZFC | BIODF 060     | F  | 19.2182493 | -99.06302778 | Mexico, Mexico city, Axomulco             |   | X |   |
| <i>D. b. baritula</i> | MZFC | CONACYT 770   | F  | 18.165     | -96.99666667 | Mexico, Oaxaca, Puerto de la Soledad      |   | X |   |
| <i>D. b. baritula</i> | MZFC | DONAD 059     | F  | 19.3901944 | -99.20422222 | Mexico, Mexico city, UNAM                 |   | X |   |
| <i>D. b. baritula</i> | MZFC | GUER 17       | M  | 17.61583   | -99.83861    | Mexico, Guerrero, Carrizal de Bravo       |   | X | X |
| <i>D. b. baritula</i> | MZFC | GUER 18       | F  | 17.61583   | -99.83861    | Mexico, Guerrero, Carrizal de Bravo       |   | X |   |
| <i>D. b. baritula</i> | MZFC | IFFD 0018     | M  | 17.8074167 | -100.9154667 | Mexico, Guerrero, Los Vergeles            |   | X | X |
| <i>D. b. baritula</i> | MZFC | INECOL 073    | F  | 17.2054056 | -97.83656111 | Mexico, Oaxaca, Chicahuaxtla              |   | X |   |
| <i>D. b. baritula</i> | MZFC | INECOL 074    | F  | 17.2054056 | -97.83656111 | Mexico, Oaxaca, Chicahuaxtla              |   | X |   |
| <i>D. b. baritula</i> | MZFC | INECOL 075    | M  | 17.2054056 | -97.83656111 | Mexico, Oaxaca, Chicahuaxtla              |   | X | X |
| <i>D. b. baritula</i> | MZFC | JEMP 360      | F  | 18.566     | -99.6        | Mexico, Guerrero, El Huizteco             |   | X |   |
| <i>D. b. baritula</i> | MZFC | JEMP 503      | F  | 18.65      | -99.78333333 | Mexico, Guerrero, Los Jarillos            |   | X |   |
| <i>D. b. baritula</i> | MZFC | JEMP 505      | M  | 18.65      | -99.78333333 | Mexico, Guerrero, Los Jarillos            |   | X | X |
| <i>D. b. baritula</i> | MZFC | JEMP 506      | M  | 18.65      | -99.78333333 | Mexico, Guerrero, Los Jarillos            |   | X | X |
| <i>D. b. baritula</i> | MZFC | JEMP 507      | M  | 18.65      | -99.78333333 | Mexico, Guerrero, Los Jarillos            |   | X | X |
| <i>D. b. baritula</i> | MZFC | JK04 111      | F  | 17.816713  | -99.967595   | Mexico, Guerrero, Carrizal de Bravo       |   | X |   |
| <i>D. b. baritula</i> | MZFC | JK04 112      | F  | 17.816713  | -99.967595   | Mexico, Guerrero, Carrizal de Bravo       |   | X |   |
| <i>D. b. baritula</i> | MZFC | JK04 164      | M  | 17.816713  | -99.967595   | Mexico, Guerrero, Carrizal de Bravo       |   | X | X |
| <i>D. b. baritula</i> | MZFC | JK04 174      | F  | 17.816713  | -99.967595   | Mexico, Guerrero, Carrizal de Bravo       |   | X |   |
| <i>D. b. baritula</i> | MZFC | JK04 176      | F  | 17.816713  | -99.967595   | Mexico, Guerrero, Carrizal de Bravo       |   | X |   |
| <i>D. b. baritula</i> | CNAV | JK11 201      | M  | 17.5741    | -99.69       | Mexico, Guerrero, Omiltemi                |   | X | X |
| <i>D. b. baritula</i> | CNAV | JK11 206      | M  | 17.5741    | -99.69       | Mexico, Guerrero, Omiltemi                |   | X | X |
| <i>D. b. baritula</i> | CNAV | JMD 437       | F  | 17.614166  | -99.851      | Mexico, Guerrero, Leonardo Bravo          |   | X |   |
| <i>D. b. baritula</i> | CNAV | LGM 08        | M  | 21.46262   | -100.99472   | Mexico, Guanajuato, San Diego de la Unión |   | X | X |
| <i>D. b. baritula</i> | CNAV | MM 458        | M  | 19.4231644 | -102.233     | Mexico, Michoacán, Nuevo Parangaricutiro  |   | X | X |
| <i>D. b. baritula</i> | MZFC | MOL15 31      | F  | 16.08972   | -96.48548    | Mexico, Oaxaca, Puente Río Molino         |   | X |   |
| <i>D. b. baritula</i> | MZFC | MOLGRO 105    | M  | 17.55      | -99.66666667 | Mexico, Guerrero, Omiltemi                | X |   |   |
| <i>D. b. baritula</i> | MZFC | MOLGRO 143    | F  | 17.55      | -99.66666667 | Mexico, Guerrero, Omiltemi                |   | X |   |
| <i>D. b. baritula</i> | MZFC | MOLGRO 150    | F  | 17.55      | -99.66666667 | Mexico, Guerrero, Omiltemi                |   | X |   |
| <i>D. b. baritula</i> | MZFC | MOLGRO 193    | M  | 17.58668   | -99.83707    | Mexico, Guerrero, Carrizal de Bravo       |   | X | X |
| <i>D. b. baritula</i> | MZFC | MOLGRO 242    | M  | 17.58668   | -99.83707    | Mexico, Guerrero, Carrizal de Bravo       |   | X | X |
| <i>D. b. baritula</i> | MZFC | MOLGRO 243    | F  | 17.58668   | -99.83707    | Mexico, Guerrero, Carrizal de Bravo       |   | X |   |
| <i>D. b. baritula</i> | MZFC | MOLGRO 244    | F  | 17.58668   | -99.83707    | Mexico, Guerrero, Carrizal de Bravo       |   | X |   |
| <i>D. b. baritula</i> | MZFC | MOLGRO 245    | M  | 17.58668   | -99.83707    | Mexico, Guerrero, Carrizal de Bravo       |   | X | X |
| <i>D. b. baritula</i> | MZFC | MT 157        | M  | 17.515     | -96.505      | Mexico, Oaxaca, La Esperanza              |   | X | X |
| <i>D. b. baritula</i> | MZFC | OMVP 0090     | F  | 18.17      | -96.84666667 | Mexico, Oaxaca, Sierra de Huautla         |   | X |   |
| <i>D. b. baritula</i> | MZFC | OMVP 0240     | ND | 17.025     | -97.795      | Mexico, Oaxaca, Santa María Yucuhiti      | X |   |   |
| <i>D. b. baritula</i> | MZFC | OMVP 0972     | F  | 17.845     | -96.74       | Mexico, Oaxaca, Peña Verde                |   | X |   |
| <i>D. b. baritula</i> | MZFC | PEP 352       | M  | 17.4666667 | -100.1666667 | Mexico, Guerrero, Puerto Gallo            |   | X | X |
| <i>D. b. baritula</i> | MZFC | PEP 364       | M  | 17.4666667 | -100.1666667 | Mexico, Guerrero, Puerto Gallo            |   | X | X |
| <i>D. b. baritula</i> | MZFC | PEP 368       | M  | 17.4666667 | -100.1666667 | Mexico, Guerrero, Puerto Gallo            |   | X | X |
| <i>D. b. baritula</i> | MZFC | PEP 371       | F  | 17.4666667 | -100.1666667 | Mexico, Guerrero, Puerto Gallo            |   | X |   |
| <i>D. b. baritula</i> | MZFC | PEP 396       | F  | 17.4666667 | -100.1666667 | Mexico, Guerrero, Puerto Gallo            |   | X |   |
| <i>D. b. baritula</i> | MZFC | PEP 602       | M  | 17.4666667 | -100.1666667 | Mexico, Guerrero, Puerto Gallo            |   | X | X |
| <i>D. b. baritula</i> | MZFC | PEP 762       | F  | 17.55      | -99.66666667 | Mexico, Guerrero, Omiltemi                |   | X |   |

|                      |      |           |    |            |              |                                                     |   |   |   |
|----------------------|------|-----------|----|------------|--------------|-----------------------------------------------------|---|---|---|
| <i>D. b. montana</i> | USNM | 30724     | M  | 14.8       | -91.0167     | Guatemala, Chimaltenango, Tecpán                    |   | X | X |
| <i>D. b. montana</i> | UWBM | 110015    | ND | 14.7166667 | -91.535      | Guatemala, Quetzaltenango, Santa María de Jesús     | X |   |   |
| <i>D. b. montana</i> | USNM | 349723    | M  | 14.86666   | -91.21666    | Guatemala, Totonicapán, María Tecun                 |   | X | X |
| <i>D. b. montana</i> | USNM | 349724    | M  | 14.8       | -91.0167     | Guatemala, Chimaltenango, Tecpán                    |   | X | X |
| <i>D. b. montana</i> | USNM | 349725    | F  | 14.8       | -91.0167     | Guatemala, Chimaltenango, Tecpán                    |   | X |   |
| <i>D. b. montana</i> | AMNH | 398054    | M  | 14.76667   | -91          | Guatemala, Chimaltenango, Tecpán                    |   | X | X |
| <i>D. b. montana</i> | AMNH | 398055    | M  | 14.76667   | -91          | Guatemala, Chimaltenango, Tecpán                    |   | X |   |
| <i>D. b. montana</i> | AMNH | 398056    | F  | 14.76667   | -91          | Guatemala, Chimaltenango, Tecpán                    |   | X |   |
| <i>D. b. montana</i> | AMNH | 398057    | F  | 14.8       | -91.0167     | Guatemala, Chimaltenango, Tecpán                    |   | X |   |
| <i>D. b. montana</i> | AMNH | 398062    | M  | 14.61667   | -90.66667    | Guatemala, Sacatepéquez, San Lucas                  |   | X | X |
| <i>D. b. montana</i> | AMNH | 398063    | M  | 14.61667   | -90.66667    | Guatemala, Sacatepéquez, San Lucas                  |   | X | X |
| <i>D. b. montana</i> | AMNH | 398064    | M  | 14.61667   | -90.66667    | Guatemala, Sacatepéquez, San Lucas                  |   | X | X |
| <i>D. b. montana</i> | AMNH | 398065    | F  | 14.61667   | -90.66667    | Guatemala, Sacatepéquez, San Lucas                  |   | X |   |
| <i>D. b. montana</i> | AMNH | 748477    | M  | 17.1599    | -92.8999     | Mexico, Chiapas, Pueblo Nuevo Solistahuacán         |   | X | X |
| <i>D. b. montana</i> | MZFC | BEHB08 14 | F  | 16.7278528 | -92.69638889 | Mexico, Chiapas, Cerro Huitepec                     |   | X |   |
| <i>D. b. montana</i> | MZFC | BEHB08 26 | F  | 16.7278528 | -92.69638889 | Mexico, Chiapas, Cerro Huitepec                     |   | X |   |
| <i>D. b. montana</i> | MZFC | BEHB08 38 | M  | 16.7278528 | -92.69638889 | Mexico, Chiapas, Cerro Huitepec                     |   | X | X |
| <i>D. b. montana</i> | MZFC | BEHB08 46 | M  | 16.7278528 | -92.69638889 | Mexico, Chiapas, Cerro Huitepec                     |   | X | X |
| <i>D. b. montana</i> | MZFC | BMM 866   | M  | 15.1316667 | -92.10833333 | Mexico, Chiapas, Volcán Tacaná                      |   | X | X |
| <i>D. b. montana</i> | MZFC | BMM 879   | F  | 15.1316667 | -92.10833333 | Mexico, Chiapas, Volcán Tacaná                      |   | X |   |
| <i>D. b. montana</i> | MZFC | BONA 37   | M  | 15.0666667 | -92.08333333 | Mexico, Chiapas, Volcán Tacaná                      |   | X | X |
| <i>D. b. montana</i> | MZFC | BONA 50   | M  | 15.0666667 | -92.08333333 | Mexico, Chiapas, Volcán Tacaná                      |   | X | X |
| <i>D. b. montana</i> | MZFC | BONA 70   | F  | 15.0666667 | -92.08333333 | Mexico, Chiapas, Volcán Tacaná                      |   | X |   |
| <i>D. b. montana</i> | MZFC | BONA 71   | M  | 15.0666667 | -92.08333333 | Mexico, Chiapas, Volcán Tacaná                      |   | X | X |
| <i>D. b. montana</i> | MZFC | BONA 73   | F  | 15.0666667 | -92.08333333 | Mexico, Chiapas, Volcán Tacaná                      |   | X |   |
| <i>D. b. montana</i> | MZFC | BONA 86   | F  | 15.0666667 | -92.08333333 | Mexico, Chiapas, Volcán Tacaná                      |   | X |   |
| <i>D. b. montana</i> | CNAV | BRB 782   | F  | 16.5026    | -93.0193     | Mexico, Chiapas, Chiapa de Corzo                    |   | X |   |
| <i>D. b. montana</i> | MZFC | CRGA 24   | F  | 15.23541   | -92.30463    | Mexico, Chiapas, Cerro Boquerón                     |   | X |   |
| <i>D. b. montana</i> | MZFC | CRGA 45   | F  | 15.23541   | -92.30463    | Mexico, Chiapas, Cerro Boquerón                     |   | X |   |
| <i>D. b. montana</i> | MZFC | CRH 024   | F  | 17.16613   | -93.14163    | Mexico, Chiapas, Coapilla                           |   | X |   |
| <i>D. b. montana</i> | MZFC | CRH 031   | M  | 17.16613   | -93.14163    | Mexico, Chiapas, Coapilla                           |   | X | X |
| <i>D. b. montana</i> | MZFC | EAGT 830  | M  | 15.23541   | -92.30463    | Mexico, Chiapas, Cerro Boquerón                     |   | X | X |
| <i>D. b. montana</i> | MZFC | EAGT 841  | M  | 15.23541   | -92.30463    | Mexico, Chiapas, Cerro Boquerón                     |   | X | X |
| <i>D. b. montana</i> | MZFC | MFOR 736  | M  | 17.18758   | -93.12125    | Mexico, Chiapas, Tapalapa                           |   | X | X |
| <i>D. b. montana</i> | MZFC | MFOR 744  | M  | 17.18758   | -93.12125    | Mexico, Chiapas, Tapalapa                           |   | X | X |
| <i>D. b. montana</i> | MZFC | MOL13 008 | F  | 16.7380556 | -92.68805556 | Mexico, Chiapas, Cerro Huitepec                     |   | X |   |
| <i>D. b. montana</i> | MZFC | MOL13 014 | F  | 16.7380556 | -92.68805556 | Mexico, Chiapas, Cerro Huitepec                     |   | X |   |
| <i>D. b. montana</i> | MZFC | MOL13 037 | M  | 16.7380556 | -92.68805556 | Mexico, Chiapas, Cerro Huitepec                     |   | X | X |
| <i>D. b. montana</i> | MZFC | MOL13 038 | M  | 16.7380556 | -92.68805556 | Mexico, Chiapas, Cerro Huitepec                     |   | X | X |
| <i>D. b. montana</i> | MZFC | MOL13 071 | M  | 16.7380556 | -92.68805556 | Mexico, Chiapas, Cerro Huitepec                     |   | X | X |
| <i>D. b. montana</i> | MZFC | MOL13 080 | F  | 16.7380556 | -92.68805556 | Mexico, Chiapas, Cerro Huitepec                     |   | X |   |
| <i>D. b. montana</i> | MZFC | MOL13 081 | M  | 16.7380556 | -92.68805556 | Mexico, Chiapas, Cerro Huitepec                     | X | X | X |
| <i>D. b. montana</i> | MZFC | MOL13 083 | F  | 16.7380556 | -92.68805556 | Mexico, Chiapas, Cerro Huitepec                     |   | X |   |
| <i>D. b. montana</i> | MZFC | MOL13 093 | F  | 16.7380556 | -92.68805556 | Mexico, Chiapas, Cerro Huitepec                     |   | X |   |
| <i>D. b. montana</i> | MZFC | MOL13 131 | M  | 16.7380556 | -92.68805556 | Mexico, Chiapas, Cerro Huitepec                     |   | X | X |
| <i>D. b. parva</i>   | MLZ  | 16844     | F  | 14.4       | -89.23333    | Honduras, Ocotepeque, El Chorro                     |   | X |   |
| <i>D. b. parva</i>   | MLZ  | 18353     | F  | 14.516667  | -88.75       | Honduras, Ocotepeque, Cerro Verde                   |   | X |   |
| <i>D. b. parva</i>   | MLZ  | 18355     | F  | 14.516667  | -88.75       | Honduras, Ocotepeque, Cerro Verde                   |   | X |   |
| <i>D. b. parva</i>   | MLZ  | 18356     | F  | 14.516667  | -88.75       | Honduras, Ocotepeque, Cerro Verde                   |   | X |   |
| <i>D. b. parva</i>   | MLZ  | 18361     | M  | 14.516667  | -88.75       | Honduras, Ocotepeque, Cerro Verde                   |   | X | X |
| <i>D. b. parva</i>   | MLZ  | 18362     | M  | 14.516667  | -88.75       | Honduras, Ocotepeque, Cerro Verde                   |   | X | X |
| <i>D. b. parva</i>   | MLZ  | 18363     | M  | 14.516667  | -88.75       | Honduras, Ocotepeque, Cerro Verde                   |   | X | X |
| <i>D. b. parva</i>   | MLZ  | 26635     | M  | 14.33333   | -87.4        | Honduras, Francisco Morazán, Cantoral               |   | X | X |
| <i>D. b. parva</i>   | MLZ  | 26636     | F  | 14.33333   | -87.4        | Honduras, Francisco Morazán, Cantoral               |   | X |   |
| <i>D. b. parva</i>   | MLZ  | 26637     | M  | 14.58333   | -88          | Honduras, Francisco Morazán, San Marcos de Guaimaca |   | X |   |

|                        |       |          |    |            |            |                                        |   |   |   |
|------------------------|-------|----------|----|------------|------------|----------------------------------------|---|---|---|
| <i>D. b. parva</i>     | LSUMZ | 60978    | ND | 13.9388    | -87.1691   | Honduras, Francisco Morazán, Santa Ana | X |   |   |
| <i>D. b. parva</i>     | MVZ   | 86316    | M  | 14.38306   | -89.12899  | Honduras, Ocotepeque, El Pital         |   | X | X |
| <i>D. b. parva</i>     | MVZ   | 86322    | F  | 14.38306   | -89.12899  | Honduras, Ocotepeque, El Pital         |   | X |   |
| <i>D. b. parva</i>     | AMNH  | 326509   | M  | 14.220453  | -87.913411 | Honduras, La Paz, Muye                 |   | X | X |
| <i>D. b. parva</i>     | AMNH  | 326510   | F  | 14.236378  | -87.957242 | Honduras, Tegucigalpa, Archaga         |   | X |   |
| <i>D. b. parva</i>     | AMNH  | 328423   | M  | 14.33333   | -87.4      | Honduras, Francisco Morazán, Cantoral  |   | X |   |
| <i>D. b. parva</i>     | AMNH  | 328424   | M  | 14.33333   | -87.4      | Honduras, Francisco Morazán, Cantoral  |   | X | X |
| <i>D. b. parva</i>     | AMNH  | 328425   | M  | 14.33333   | -87.4      | Honduras, Francisco Morazán, Cantoral  |   | X | X |
| <i>D. b. parva</i>     | AMNH  | 328426   | M  | 14.33333   | -87.4      | Honduras, Francisco Morazán, Cantoral  |   | X | X |
| <i>D. b. parva</i>     | AMNH  | 328427   | M  | 14.33333   | -87.4      | Honduras, Francisco Morazán, Cantoral  |   | X | X |
| <i>D. b. parva</i>     | AMNH  | 328428   | M  | 14.3423    | -87.2946   | Honduras, Tegucigalpa, Archaga         |   | X | X |
| <i>D. b. parva</i>     | AMNH  | 328429   | F  | 14.3423    | -87.2946   | Honduras, Tegucigalpa, Archaga         |   | X |   |
| <i>D. b. parva</i>     | AMNH  | 328430   | M  | 14.33333   | -87.4      | Honduras, Francisco Morazán, Cantoral  |   | X | X |
| <i>D. b. parva</i>     | USNM  | 348152   | M  | 14.43333   | -87.78333  | Honduras, Francisco Morazán, Cantoral  |   | X | X |
| <i>D. b. parva</i>     | USNM  | 348172   | F  | 14.43333   | -87.78333  | Honduras, Francisco Morazán, Cantoral  |   | X |   |
| <i>D. plumbea</i>      | LSUMZ | 28266    | ND | ND         | ND         | Panama, Chiriquí                       | X |   |   |
| <i>E. hirundinacea</i> | MZFC  | MISA 110 | M  | 19.7699444 | -96.862083 | Mexico, Veracruz, Villa Nueva          | X |   |   |

Abbreviations for column names: Collection (Collec), Gender (G), Latitude (Lat), Longitude (Long), Genomic (Gen), Morphology (Morp), Coloration (Col).

Abbreviations for collections of voucher specimens: Colección Nacional de Aves, Instituto de Biología, UNAM (CNAV); Moore Laboratory of Zoology, Occidental College (MLZ); National Museum of Natural History, Smithsonian Institution (USNM), American Museum of Natural History (AMNH); Louisiana State University Museum of Natural Science (LSUMZ); Museum of Vertebrate Zoology, University of California, Berkeley (MVZ); University of Washington Burke Museum of Natural History and Culture (UWBM); Field Museum of Natural History (FMNH); Museo de Zoología "Alfonso L. Herrera", Facultad de Ciencias, Universidad Nacional Autónoma de México (MZFC).

Abbreviations for Gender: female (F) and male (M).

The asterisk represents the reference genome used.
